# Supplementary material for: Specific drug delivery efficiently induced human breast tumor regression using a lipoplex by non-covalent association with anti-tumor antibodies
Source: PubMed Central journal article supplement (PMC6364477; doi:10.1186/s12951-019-0457-3), 2019-02-06
Supplement: 12951_2019_457_MOESM1_ESM.pdf [file 12951_2019_457_MOESM1_ESM.pdf]

*Supporting Materials for*

**Specific drug delivery efficiently induced human breast tumor  
regression using a novel lipoplex by non-covalent association with  
anti-tumor antibodies**

Yu-Ling Lin<sup>1 †</sup>, Nu-Man Tsai<sup>2,3</sup>, Chia-Hung Chen<sup>4 †</sup>, Yen-Ku Liu<sup>5</sup>, Chung-Jen Lee<sup>6</sup>,  
Yi-Lin Chan<sup>7</sup>, Yu-Shan Wang<sup>8</sup>, Yuan-Ching Chang<sup>9</sup>, Chi-Hsin Lin<sup>10</sup>, Tse-Hung  
Huang<sup>11,12,13</sup>, Chao Ching Wang<sup>11</sup>, Kwan-Hwa Chi<sup>8,\*</sup> and Kuang-Wen Liao<sup>4,5,14,\*</sup>

\* Author for correspondence:

Kuang-Wen Liao, Ph.D.

Department of Biological Science and Technology

National Chiao Tung University

No.75 Po-Ai Street, Hsinchu 30068, Taiwan

Tel: 886-3-5712121 ext 56955; Fax: 886-3-5729288

E-mail: liaonms@pchome.com.tw

**Kwan-Hwa Chi, M.D.**

Department of Radiation Therapy and Oncology

Shin Kong Wu Ho-Su Memorial Hospital

No.95, Wenchang Rd., Shilin Dist., Taipei City 11101, Taiwan

Tel: 886-2-28332211 ext 2273; Fax: 886-2-28377582

E-mail: [M006565@ms.skh.org.tw](mailto:M006565@ms.skh.org.tw)

### **Targeting ability of drug/LPPC/Herceptin complexes *in vitro***

MCF7 cells ( $5 \times 10^5$  per each well) were coated in a 96-well microtiter plate overnight, and the plate was blocked with 1% skim milk for 1 h. The immunocomplexes such as Cur/LPPC/Herceptin or Cur/LPPC/Retuximab were applied to the MCF7 cell-coated plate and incubated for 1 h on ice. Both immunocomplexes contains 40  $\mu\text{g}$  LPPC and 8.7 mM of curcumin. After washing the unbound immunocomplexes with PBST (0.05% Tween 20 in PBS), the cell-bound immunocomplexes were dissolved by DMSO, and the curcumin concentration was measured using an ELISA reader at 450 nm.

### **The pharmacokinetics of curcumin *in vivo***

Balb/c mice were intravenously injected with PBS, curcumin, curcumin/LPPC or curcumin/LPPC/Herceptin, and the blood samples were harvested from the tail vein at 0.5, 1, 8, 24, and 36 h. After centrifugation ( $1,100 \times g$ ,  $4^\circ\text{C}$ , 25 min), plasma samples were obtained and extracted with a 2-fold volume of ethyl acetate. The ethyl acetate extracts were evaporated, dissolved in 100  $\mu\text{l}$  of DMSO, and assessed using an ELISA reader at 450 nm. All pharmacokinetic analyses were performed using the WinNonlin Standard Edition Version 5.3 (Scientific Consulting Inc., Apex, NC, USA). A non-compartmental model was utilized for both data fitting and parameter

estimation.

### **The bio-distribution of curcumin and tissue damage *in vivo***

NOD-SCID mice received subcutaneous injections of SKBR3 cells ( $1 \times 10^7$  cells in 100  $\mu$ l of PBS). After the injection period, the animals were sacrificed. The tumors and organs were harvested, fixed in 10% buffered formalin saline and then embedded in paraffin blocks. Tissue sections (4- $\mu$ m thickness) were prepared and stained with hematoxylin and eosin (H&E). The tissue morphology was examined using a microscope with 400X magnification. The fluorescence of curcumin and doxorubicin in the pathological sections was photographed under the fluorescence microscopy.

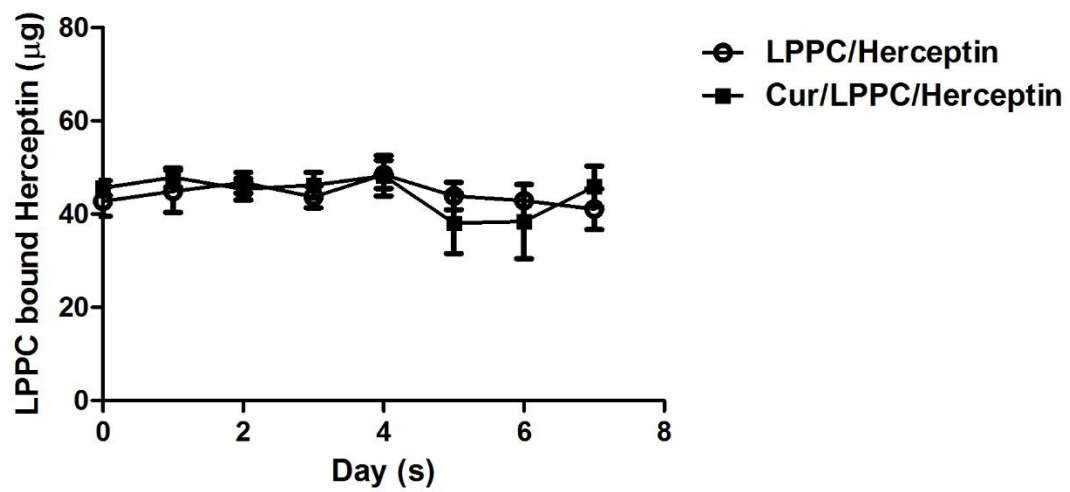

Figure S1. Stabilities of LPPC/Herceptin or Cur/LPPC/Herceptin. The amounts of LPPC bound Herceptin were measured by the Bradford assay. Representative data are shown as the mean  $\pm$  SD of two independent experiments (n=4).

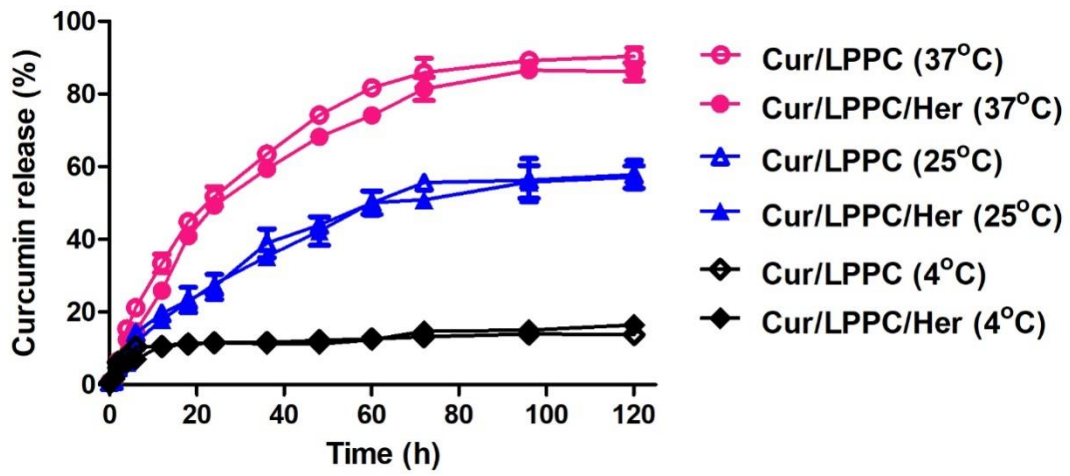

Figure S2. The effect of Herceptin association on curcumin release from the curcumin/LPPC complexes. Curcumin/LPPC or Curcumin/LPPC/Herceptin complexes were incubated in serum (10% FBS in PBS) at 0, 25 or 37°C. The concentration of curcumin in each supernatant was measured at various incubation time points and compared with the total curcumin concentration. All values represent the mean  $\pm$  SD (n=3).

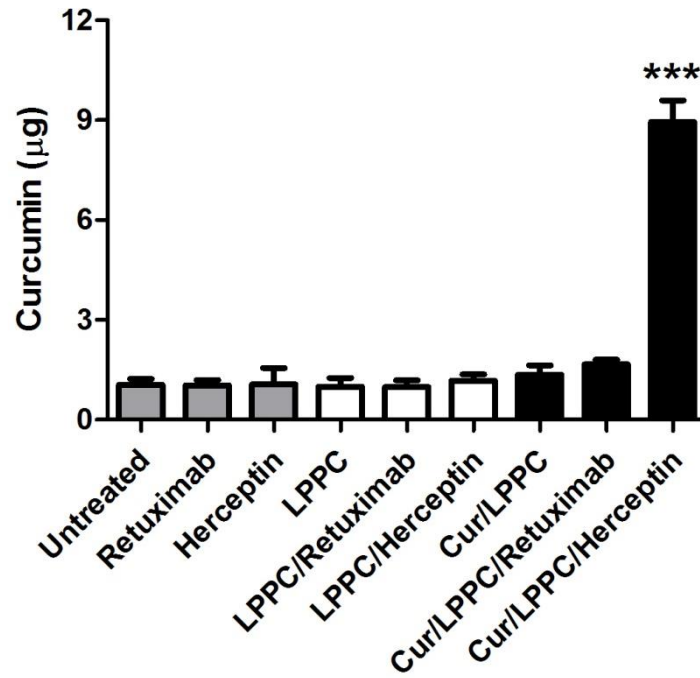

Figure S3. The effect of curcumin loading on the cell targeting of Cur/LPPC/Herceptin *in vitro*. MCF-7 cells were treated with Cur/LPPC/Herceptin for 1 h on ice. LPPC/Herceptin, LPPC/Retuximab, Cur/LPPC or Cur/LPPC/Retuximab were used as control. All immunocomplexes contained 40 µg LPPC and 8.7 mM of curcumin. The cell-bound Cur/LPPC/Herceptin were dissolved by DMSO and then the concentrations of curcumin were analyzed. All values represent the mean  $\pm$  SD, \*\*\* $p < 0.001$  (n=4).

**A**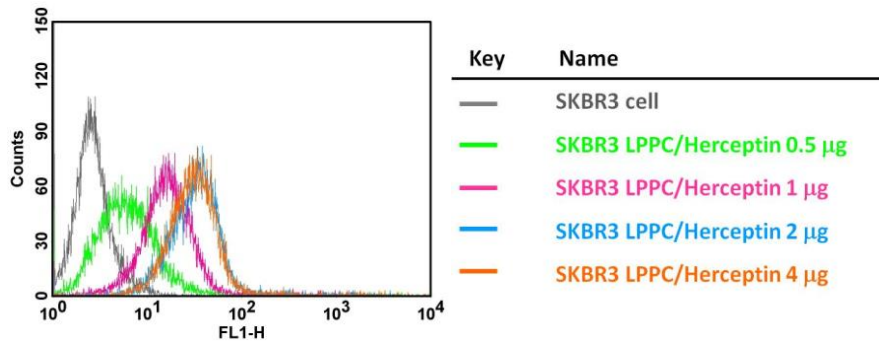**B**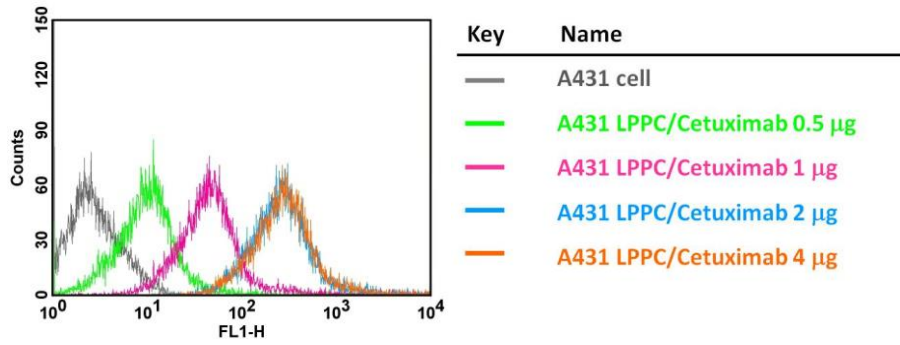**C**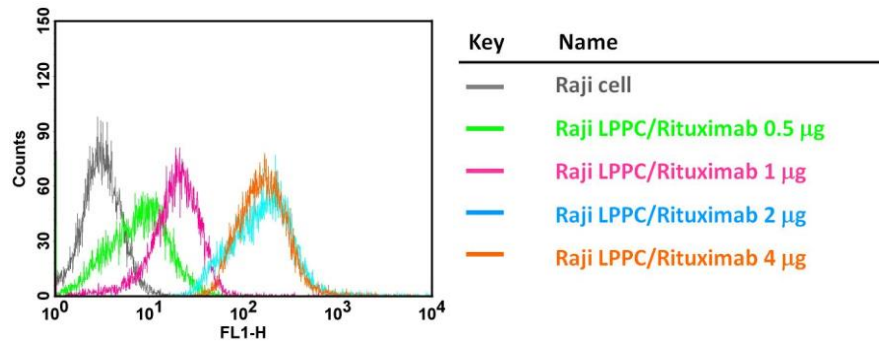**D**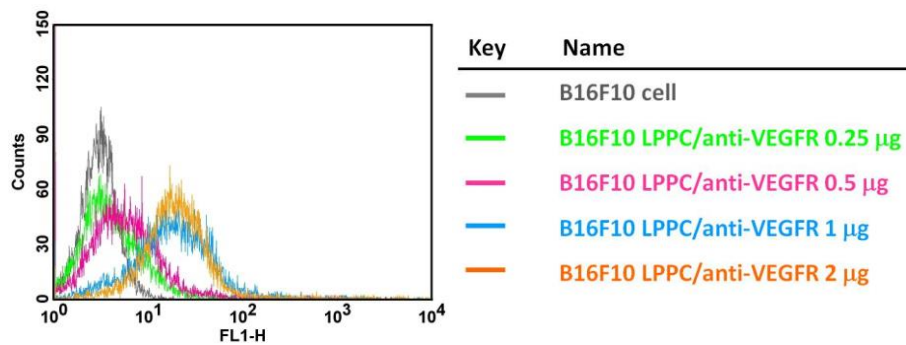



**E**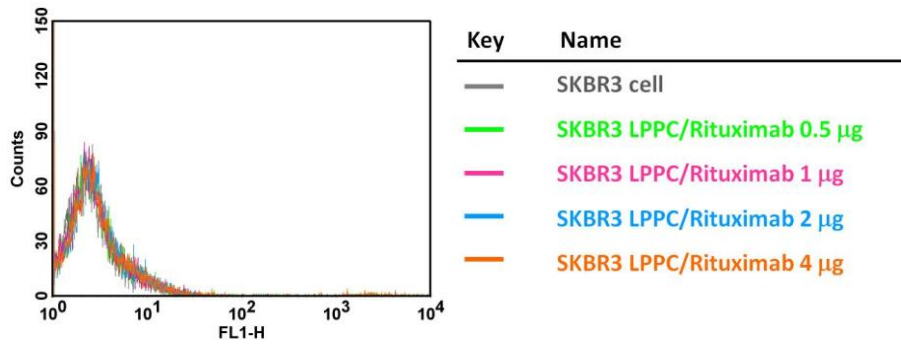

Figure S4. Cell targeting of DiO-labeled LPPC/antibody complexes. (A) SKBR3 (HER2 positive), (B) A431 (EGFR positive), (C) Raji (CD20 positive) and (D) B16 melanoma(VEGF positive)cells werestained with the DiO-labeled LPPC complexwith various antibodies at different doses. DiO-LPPC/Herceptin complex targeted the SKBR3 cells; DiO-LPPC/Cetuximab complex targeted the A431 cells; DiO-LPPC/Rituximab complex targeted the Raji cells; DiO-LPPC/anti-VEGFR1 antibodycomplex targeted theB16F10 melanoma cells. (E) DiO-LPPC-Rituximab complex did not target the SKBR3 cells.

**A**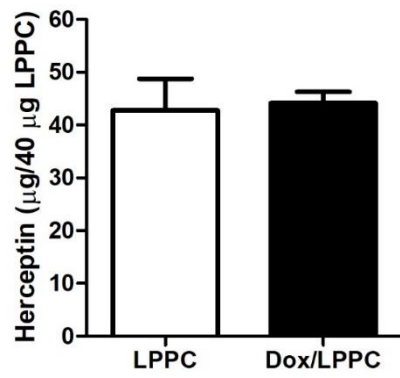**B**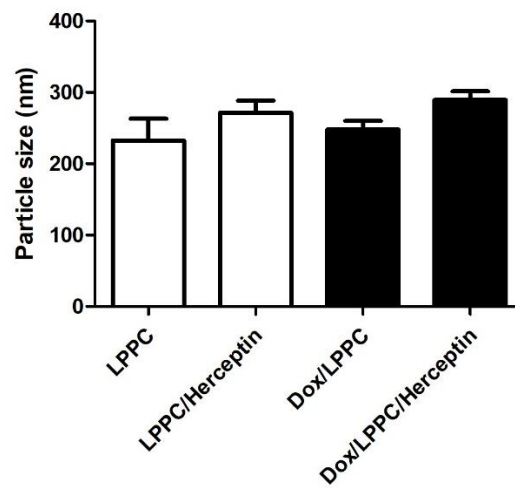**C**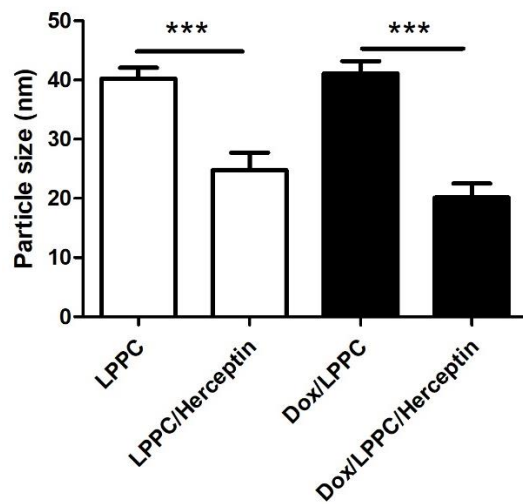**D**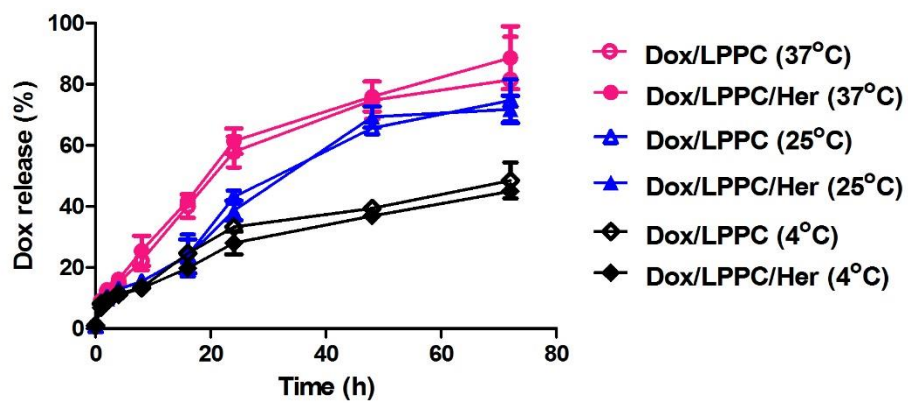

Figure S5. The characteristics of the Dox/LPPC/Herceptin complex. (A) The maximal-binding capacity of Herceptin to Dox/LPPC. Dox/LPPC (40  $\mu\text{g}$ ) was incubated with different amounts of Herceptin, and the maximal amount of bound protein was analyzed with the Bradford Assay. (B) The particle size and (C) zeta-potential of the Dox/LPPC/Herceptin complex. All values represent the mean  $\pm$  SD (n=4). (D) Dox release from the Dox/LPPC complexes. Dox/LPPC or Dox/LPPC/Herceptin complexes were incubated in serum (10% FBS in PBS) at 0, 25 or 37°C. The concentration of Dox in each supernatant was measured at various incubation time points and compared with the total Dox concentration. All values represent the mean  $\pm$  SD (n=3).

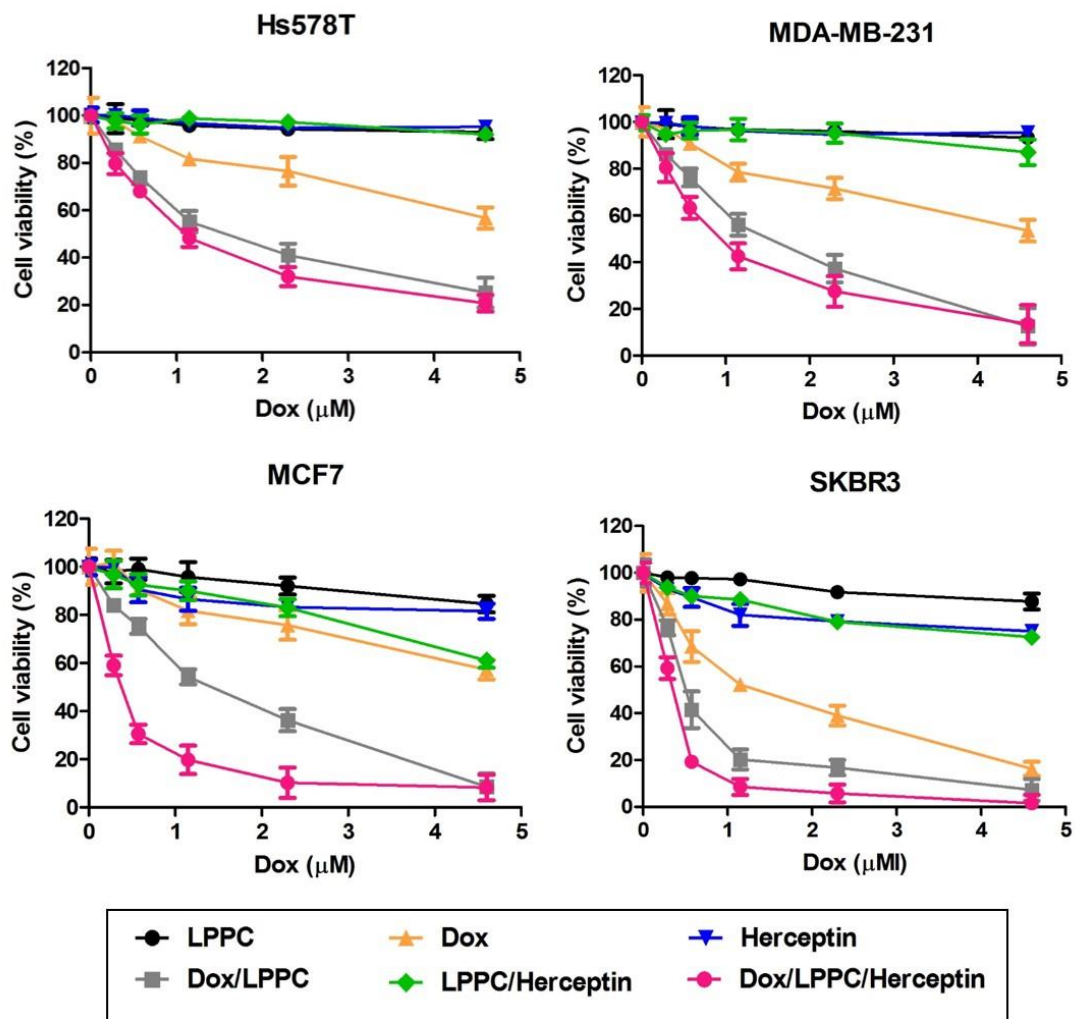

Figure S6. Cytotoxic effects of Dox/LPPC/Herceptin on HER2-negative or HER2-positive cell lines. Hs578T (HER2-), MDA-MB-231 (HER2-/+), MCF7 (HER2 +), and SKBR-3 (HER2++) cells were treated with 0 to 4.6 μM Dox for the treatment of Dox/LPPC/Herceptin for 48 h. The dosages of LPPC, Herceptin, and LPPC/Herceptin were the same as those used for the Dox/LPPC/Herceptin treatments. Cell viability was assessed by MTT assay (n=4).

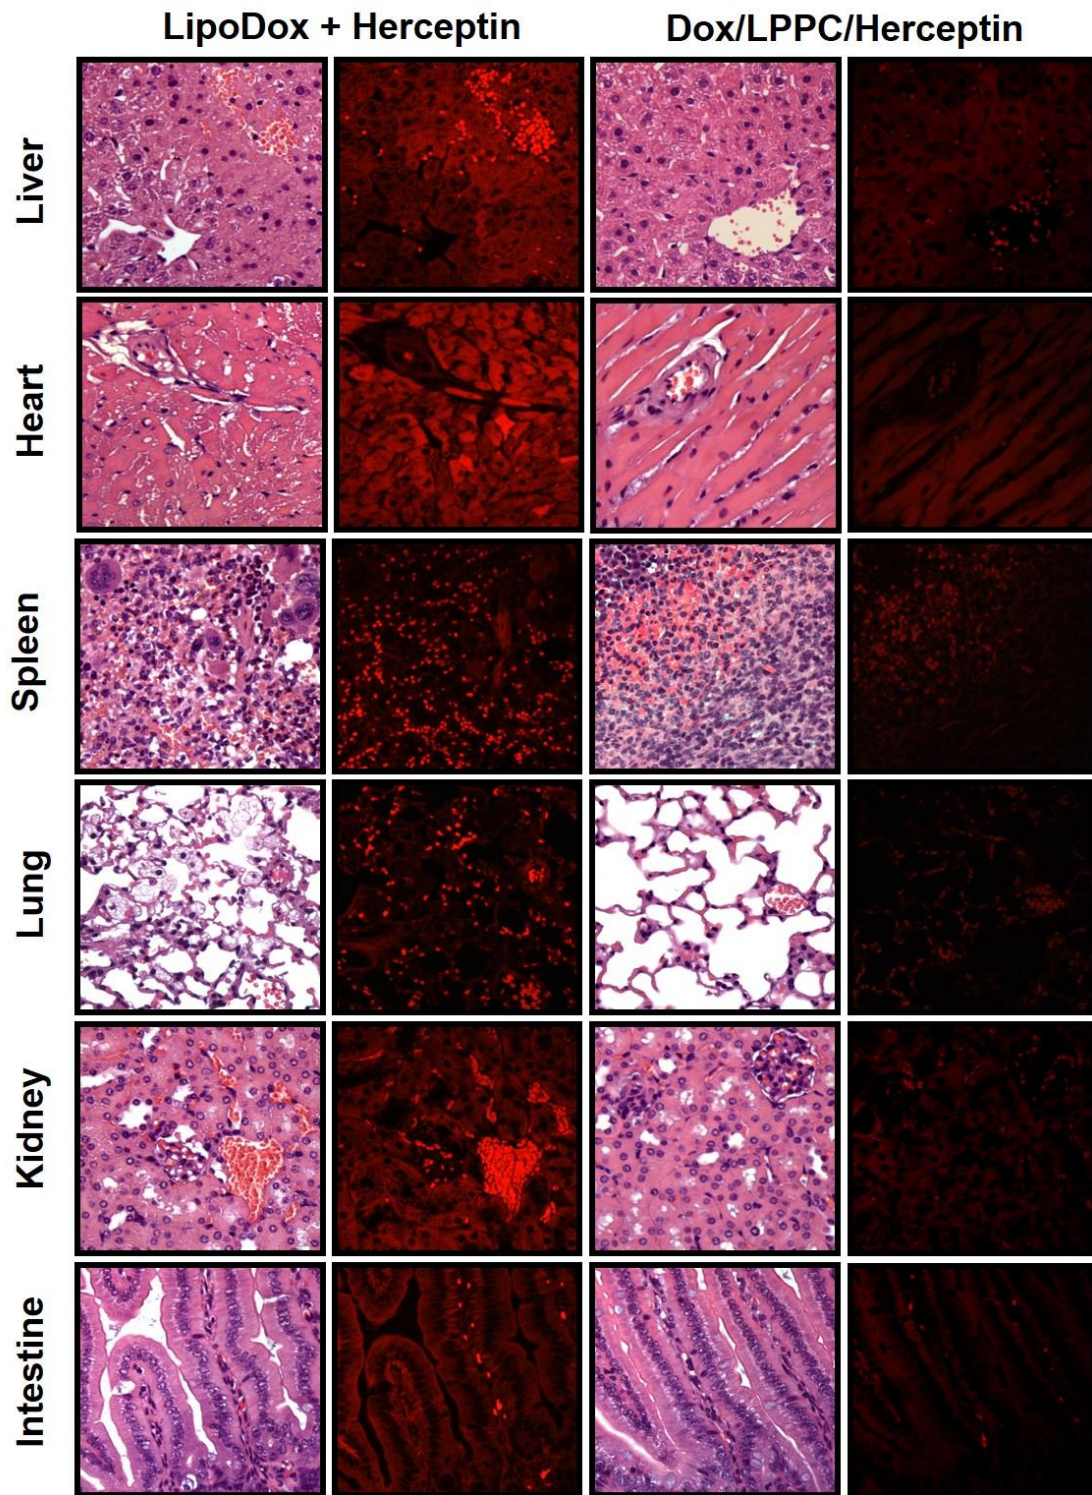

Figure S7. The bio-distribution of doxorubicin in normal tissue. NOD-SCID mice bearing SKBR3 tumors were injected intravenously with Lipodox plus either Herceptin or the Dox/LPPC/Herceptin complex at a dose of 5 mg doxorubicin/kg. The

mice were sacrificed at day 3. The histological sections of the organ samples were collected after sequential injections of Lipodox with either Herceptin or the Dox/LPPC/Herceptin complex. Dox accumulation was imaged using a fluorescent microscope; the red fluorescence indicates the Dox.

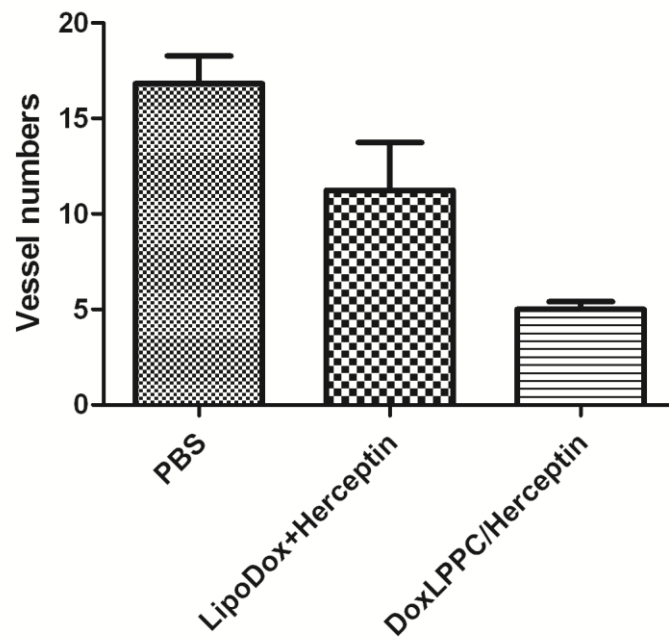

Figure S8. The anti-angiogenic activity of Dox/LPPC/Herceptin. SKBR3 cells were implanted s.c. into NOD-SCID mice. Lipodox with Herceptin or the Dox/LPPC/Herceptin complex were injected via i.v. at a dose of 5 mg doxorubicin/kg. After a 72-h treatment period, the vessel numbers in tumors were calculated. The data represent the means  $\pm$  SD (n=8).

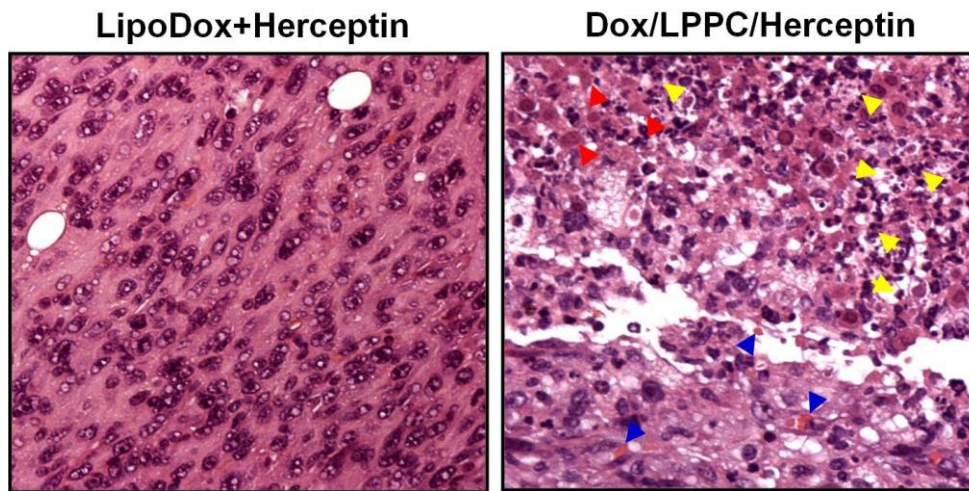

Figure S9. The levels of apoptosis and necrosis in Dox/LPPC/Herceptin-treated tumors. NOD-SCID mice bearing SKBR3 tumors were injected intravenously with Lipodox plus either Herceptin or the Dox/LPPC/Herceptin complex at a dose of 5 mg doxorubicin/kg. The mice were sacrificed at day 2. The histological sections of the tumor samples were collected after injection of the Dox/LPPC/Herceptin complex. Red arrows: cell necrosis; yellow arrows: apoptosis; blue arrows: hemorrhage.



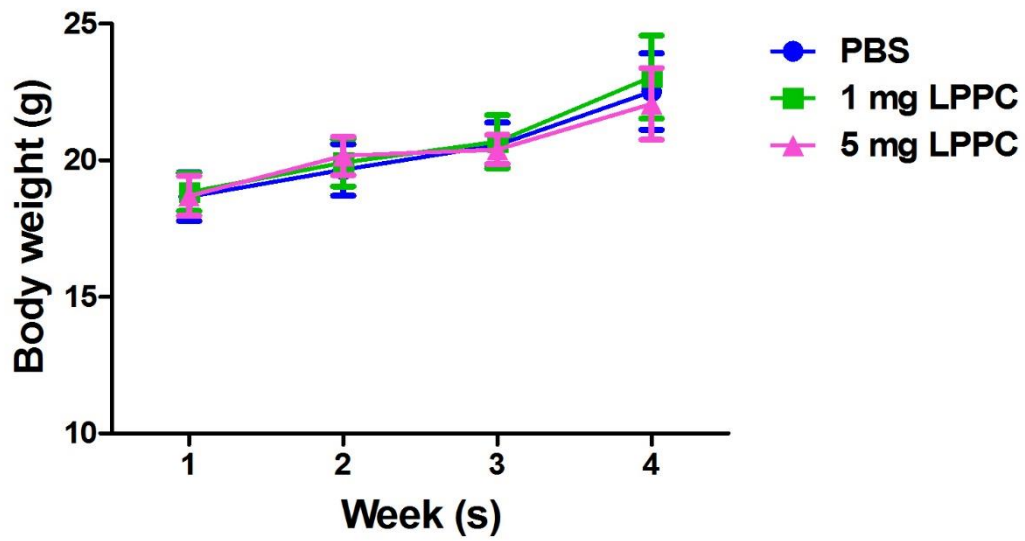

Figure S10. Average body weight of mice during treatment. BALB/c mice were treated with 5 mg LPPC per mouse for 4 weeks. The body weight of LPPC-treated mice were measured weekly. All values represent the mean  $\pm$  SD (n=6).

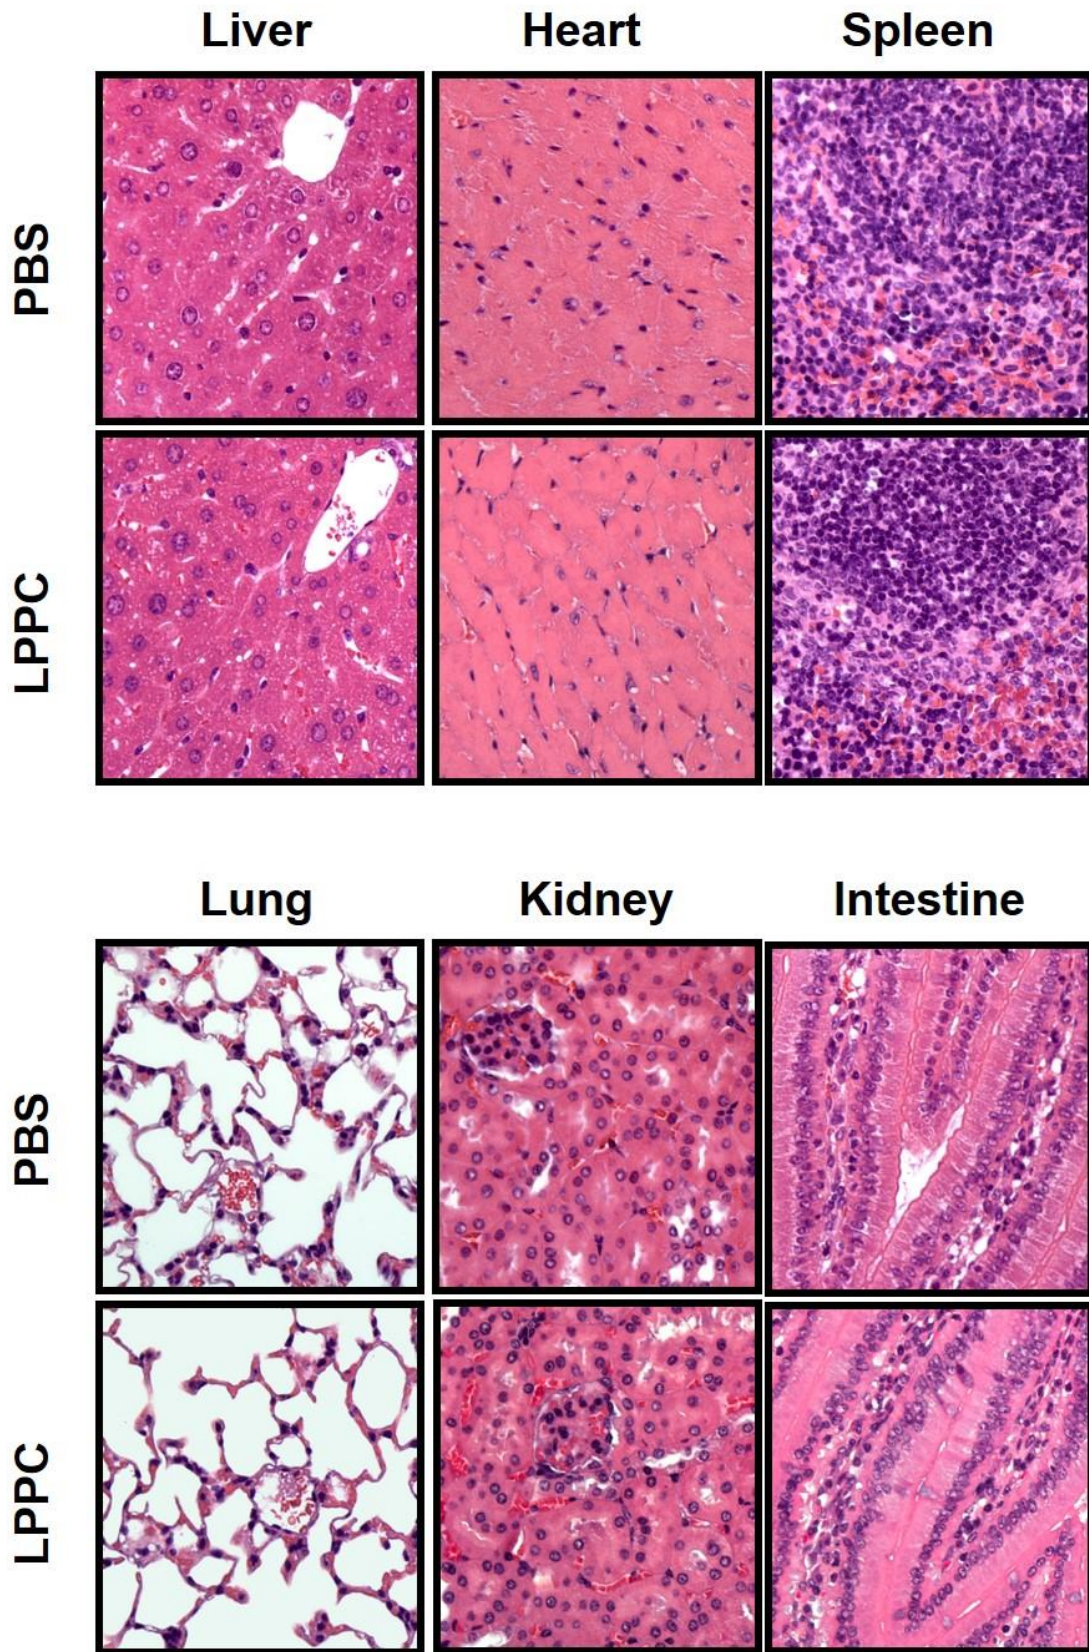

Figure S11. LPPC did not induce tissue damage in normal tissues. The BALB/cmice were treated with 5 mg LPPC per mouse for 4 weeks (n=6). The organs were

collected and evaluated by H&E staining (400X).

Table S1. The particle sizes and zeta-potentials of curcumin/LPPC/Herceptin.

| Groups             | Particle size<br>(nm) | PDI         | Zeta-potential<br>(mV) |
|--------------------|-----------------------|-------------|------------------------|
| LPPC               | 232.5 ± 30.8          | 0.19 ± 0.04 | 40.2 ± 1.8             |
| LPPC/Herceptin     | 271.6 ± 17.0          | 0.19 ± 0.12 | 24.8 ± 3.0             |
| Cur/LPPC           | 249.6 ± 25.3          | 0.23 ± 0.09 | 40.2 ± 2.0             |
| Cur/LPPC/Herceptin | 278.7 ± 22.8          | 0.17 ± 0.12 | 24.5 ± 1.1             |
| Dox/LPPC           | 248.1 ± 12.2          | 0.42 ± 0.05 | 41.1 ± 2.1             |
| Dox/LPPC/Herceptin | 289.4 ± 12.3          | 0.37 ± 0.13 | 20.2 ± 2.4             |

\* The data represent the means ± SD (n=4).

Table S2. Effects of curcumin/LPPC/Herceptin on proliferation in different cell lines.

| Cells      | IC50 ( $\mu\text{M}$ ) |                 |                    |
|------------|------------------------|-----------------|--------------------|
|            | Curcumin               | Cur/LPPC        | Cur/LPPC/Herceptin |
| Hs578T     | 12.46 $\pm$ 1.65       | 0.87 $\pm$ 0.07 | 0.59 $\pm$ 0.06    |
| MDA-MB-231 | 12.15 $\pm$ 5.23       | 1.23 $\pm$ 0.12 | 0.57 $\pm$ 0.03    |
| MCF7       | 10.21 $\pm$ 1.13       | 0.96 $\pm$ 0.23 | 0.27 $\pm$ 0.09    |
| SKBR3      | 15.73 $\pm$ 3.70       | 1.28 $\pm$ 0.14 | 0.23 $\pm$ 0.01    |

\* All values are mean  $\pm$  SD of three independent experiment (n=6).

Table S3. Effects of Dox/LPPC/Herceptin on proliferation in different cell lines.

| Cells      | IC50 ( $\mu\text{M}$ ) |                 |                    |
|------------|------------------------|-----------------|--------------------|
|            | Dox                    | Dox/LPPC        | Dox/LPPC/Herceptin |
| Hs578T     | 6.55 $\pm$ 1.22        | 1.58 $\pm$ 0.37 | 1.14 $\pm$ 0.15    |
| MDA-MB-231 | 5.58 $\pm$ 1.02        | 1.54 $\pm$ 0.30 | 0.95 $\pm$ 0.12    |
| MCF7       | 6.02 $\pm$ 0.71        | 1.44 $\pm$ 0.22 | 0.38 $\pm$ 0.04    |
| SKBR3      | 1.32 $\pm$ 0.14        | 0.51 $\pm$ 0.06 | 0.35 $\pm$ 0.02    |

\* All values are mean  $\pm$  SD of two independent experiment (n=4).

Table S4. The serum albumin (ALB), total protein (TP) and glucose (GLU) levels of LPPC-treated mice.

| Biochemical factors | Treated period (weeks) | Control (PBS) | PEG <sub>1500</sub> / LPPC |              |
|---------------------|------------------------|---------------|----------------------------|--------------|
|                     |                        |               | 1 mg                       | 5 mg         |
| ALB (g/dL)          | 1                      | 3.65 ± 0.12   | 3.56 ± 0.05                | 3.64 ± 0.04  |
|                     | 2                      | 3.50 ± 0.54   | 3.51 ± 0.25                | 3.49 ± 0.37  |
|                     | 3                      | 3.50 ± 0.27   | 3.54 ± 0.21                | 3.51 ± 0.23  |
|                     | 4                      | 3.56 ± 0.26   | 3.83 ± 0.28                | 3.56 ± 0.26  |
| TP (g/dL)           | 1                      | 5.43 ± 0.17   | 5.53 ± 0.02                | 5.62 ± 0.16  |
|                     | 2                      | 5.39 ± 0.24   | 5.26 ± 0.14                | 5.63 ± 0.10  |
|                     | 3                      | 5.61 ± 0.29   | 5.37 ± 0.21                | 5.11 ± 0.14  |
|                     | 4                      | 5.35 ± 0.44   | 5.76 ± 0.53                | 5.33 ± 0.45  |
| GLU (mg/dL)         | 1                      | 180.2 ± 35.3  | 156.3 ± 12.0               | 157.6 ± 25.5 |
|                     | 2                      | 124.3 ± 14.4  | 117.1 ± 14.6               | 120.2 ± 14.4 |
|                     | 3                      | 192.5 ± 26.3  | 173.9 ± 27.8               | 151.7 ± 14.4 |
|                     | 4                      | 172.7 ± 56.0  | 222.3 ± 41.3               | 176.5 ± 54.0 |

\* All values represent the mean ± SD (n=6).

Table S5. The serum alanine aminotransferase (ALT), aspartate aminotransferase (AST), creatine kinase (CK) and lactate dehydrogenase (LDH) levels of LPPC-treated mice.

| Biochemical factors | Treated period (weeks) | Control (PBS) | PEG <sub>1500</sub> /LPPC |               |
|---------------------|------------------------|---------------|---------------------------|---------------|
|                     |                        |               | 1 mg                      | 5 mg          |
| ALT (IU/L)          | 1                      | 58.0 ± 4.1    | 58.3 ± 4.2                | 60.0 ± 1.6    |
|                     | 2                      | 56.2 ± 1.3    | 56.5 ± 9.4                | 55.2 ± 7.1    |
|                     | 3                      | 60.7 ± 7.0    | 57.4 ± 3.7                | 58.8 ± 9.0    |
|                     | 4                      | 59.1 ± 9.4    | 58.3 ± 8.3                | 57.5 ± 6.7    |
| AST (IU/L)          | 1                      | 135.9 ± 60.6  | 126.1 ± 17.2              | 139.3 ± 60.6  |
|                     | 2                      | 136.6 ± 35.8  | 137.4 ± 35.3              | 134.7 ± 40.3  |
|                     | 3                      | 137.0 ± 45.4  | 137.2 ± 45.2              | 138.8 ± 34.8  |
|                     | 4                      | 137.2 ± 29.6  | 136.7 ± 22.4              | 138.5 ± 35.1  |
| CK (IU/L)           | 1                      | 476.3 ± 121.2 | 474.4 ± 101.4             | 446.5 ± 141.8 |
|                     | 2                      | 444.3 ± 244.4 | 479.6 ± 122.3             | 485.3 ± 288.2 |
|                     | 3                      | 459.4 ± 156.3 | 462.0 ± 132.2             | 472.1 ± 276.7 |
|                     | 4                      | 468.0 ± 139.7 | 469.8 ± 181.4             | 477.8 ± 188.7 |
| LDH (IU/dL)         | 1                      | 386.0 ± 40.5  | 385.5 ± 12.3              | 381.7 ± 22.2  |
|                     | 2                      | 388.0 ± 13.2  | 379.0 ± 28.6              | 383.1 ± 41.9  |
|                     | 3                      | 371.1 ± 45.3  | 380.8 ± 50.1              | 372.9 ± 40.8  |
|                     | 4                      | 385.3 ± 36.2  | 383.2 ± 30.4              | 383.8 ± 38.5  |

\* All values represent the mean ± SD (n=6).



Table S6. The creatinine, urea and lactose levels of LPPC- treated mice.

| Biochemical factors | Treated period (weeks) | Control (PBS) | PEG <sub>1500</sub> /LPPC |              |
|---------------------|------------------------|---------------|---------------------------|--------------|
|                     |                        |               | 1 mg                      | 5 mg         |
| CRE (mg/dL)         | 1                      | 0.18 ± 0.01   | 0.18 ± 0.01               | 0.18 ± 0.02  |
|                     | 2                      | 0.26 ± 0.05   | 0.23 ± 0.09               | 0.26 ± 0.09  |
|                     | 3                      | 0.19 ± 0.03   | 0.20 ± 0.01               | 0.16 ± 0.03  |
|                     | 4                      | 0.18 ± 0.06   | 0.21 ± 0.06               | 0.19 ± 0.02  |
| Urea (mg/dL)        | 1                      | 22.0 ± 4.0    | 19.7 ± 2.6                | 20.7 ± 1.2   |
|                     | 2                      | 25.6 ± 0.8    | 19.4 ± 1.1                | 23.0 ± 1.8   |
|                     | 3                      | 35.3 ± 4.2    | 27.1 ± 1.6                | 22.0 ± 3.1   |
|                     | 4                      | 29.8 ± 6.1    | 31.9 ± 3.9                | 27.7 ± 1.1   |
| Lactate (mg/dL)     | 1                      | 109.1 ± 15.9  | 112.2 ± 16.8              | 121.8 ± 17.0 |
|                     | 2                      | 104.0 ± 71.6  | 105.1 ± 56.4              | 99.9 ± 62.2  |
|                     | 3                      | 96.9 ± 53.5   | 89.9 ± 44.3               | 90.9 ± 3.8   |
|                     | 4                      | 117.2 ± 34.8  | 112.2 ± 25.0              | 89.8 ± 20.5  |

\* All values represent the mean ± SD (n=6).

Table S7. Pharmacokinetic parameters of curcumin in mice after i.v. injection with curcumin, curcumin/LPPC or curcumin/LPPC/Herceptin.

| Pharmacokinetic parameters | Curcumin†       | Cur/LPPC       | Cur/LPPC/Herceptin |
|----------------------------|-----------------|----------------|--------------------|
| C <sub>max</sub> (µg/mL)   | 15.5 ± 0.6      | 15.9 ± 0.7     | 16.7 ± 1.4         |
| AUC (minµg/mL)             | 115.4 ± 22.9    | 307.7 ± 23.2*  | 343.2 ± 18.4*      |
| t <sub>1/2</sub> (h)       | < 1             | 13.1 ± 2.3     | 13.8 ± 2.7         |
| Cl (mL/min/kg)             | 353.7 ± 70.3    | 130.5 ± 10.0*  | 116.7 ± 6.1*       |
| MRT (min)                  | 0.49 ± 0.4      | 18.4 ± 3.2*    | 19.0 ± 4.4*        |
| V <sub>ss</sub> (mL/kg)    | 3549.5 ± 1322.2 | 2458.8 ± 358.3 | 2318.0 ± 395.9     |

Data are expressed as mean ± SD, \*  $p < 0.01$ , significantly different from the curcumin group.

† The concentrations of curcumin in all groups are 40 mg/kg.

C<sub>max</sub>: maximum concentration; AUC: area concentration versus time curve; t<sub>1/2</sub>: elimination half-life; Cl: clearance; MRT: mean resident time; V<sub>ss</sub>: steady-state volume of distribution.
